# Supplementary material
Source: PubMed Central journal article supplement (PMC3500850)
Supplement: NIHMS407328-supplement-1.pdf [file NIHMS407328-supplement-1.pdf]

**Table S1: Number of altered biochemicals and directional changes in the tumor induction experiment.**

|              | Test comparison<br>(Up   Down TOTAL) | # meeting t-test<br>criteria | # meeting t-<br>test criteria |
|--------------|--------------------------------------|------------------------------|-------------------------------|
|              |                                      | $p < 0.05$                   | $p < 0.05$ AND<br>$q < 0.10$  |
| <b>LUNG</b>  | E+ vs. E- 2 WK                       | 120 11 131                   | 120 11 131                    |
|              | E+ vs. E- 8 WK                       | 223 44 267                   | 223 44 267                    |
| <b>BLOOD</b> | E+ vs. E- 3 HR                       | 2 2 4                        | 0 0 0                         |
|              | E+ vs. E- 3 DAY                      | 4 2 6                        | 0 0 0                         |
|              | E+ vs. E- 2 WK                       | 22 4 26                      | 0 0 0                         |
|              | E+ vs. E- 8 WK                       | 11 10 21                     | 4 4 8                         |

E+ = CCSP-rtTA;EGFR-L858R-T790M mice; E- = CCSP-rtTA mice
