# Supplementary material
Source: PubMed Central journal article supplement (PMC3500850)
Supplement: NIHMS407328-supplement-2.pdf [file NIHMS407328-supplement-2.pdf]

**Table S2: Number of altered biochemicals and directional changes in the drug treatment experiment.**

|              | Test comparison<br>(Up   Down TOTAL) | # meeting t-test<br>criteria | # meeting t-test<br>criteria |
|--------------|--------------------------------------|------------------------------|------------------------------|
|              |                                      | $p < 0.05$                   | $p < 0.05$ AND $q < 0.10$    |
| <b>LUNG</b>  | DRUG B vs. VEH                       | 11 16 27                     | 1 0 1                        |
|              | DRUG R vs. VEH                       | 42 125 167                   | 42 125 167                   |
|              | DRUG RB vs. VEH                      | 22 142 164                   | 22 142 164                   |
| <b>BLOOD</b> | Ratio DRUG B vs.<br>Ratio VEH        | 3 83 86                      | 2 62 64                      |
|              | Ratio DRUG R vs.<br>Ratio VEH        | 19 25 44                     | 4 6 10                       |
|              | Ratio DRUG RB vs.<br>Ratio VEH       | 9 20 29                      | 1 13 14                      |

B = BIBW 2992; R = rapamycin; VEH = vehicle; RB = rapamycin + BIBW 2992
