# Supplementary material
Source: PubMed Central journal article supplement (PMC3500850)
Supplement: NIHMS407328-supplement-6.pdf [file NIHMS407328-supplement-6.pdf]

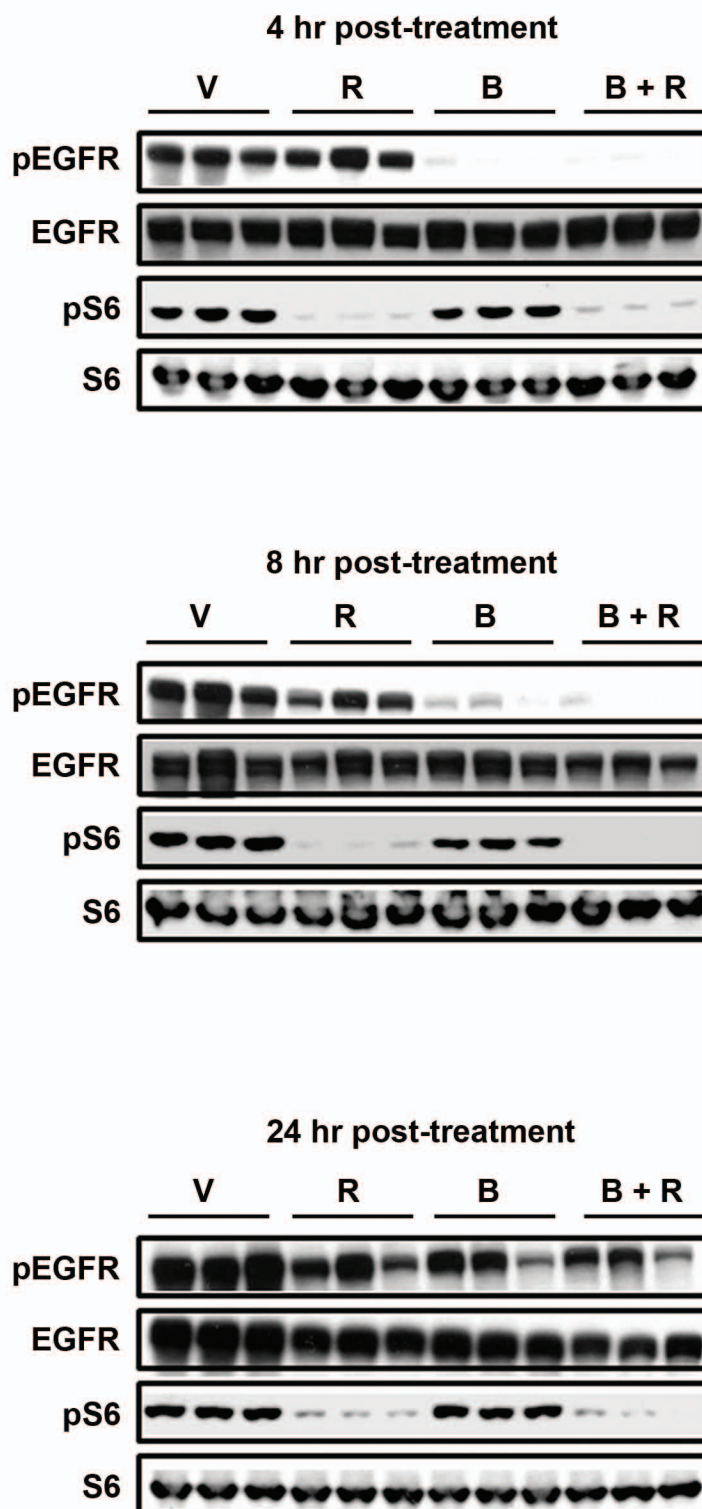

**Figure S3. Reduction of pEGFR and pS6 in BIBW 2992 and rapamycin-treated lungs at 4, 8, and 24 hours post-treatment.** Mice were induced with doxycycline feed for 6 weeks prior to drug treatment. Lung tumor-bearing mice (3 per time point) were given a single dose of vehicle (V), BIBW 2992 (B; 20mg/kg), rapamycin (R; 2mg/kg), or both drugs (B+R). Lung tissue was harvested at the indicated time points.  $\beta$ -actin was used as an internal control for loading.
