# Supplementary material
Source: PubMed Central journal article supplement (PMC3500850)
Supplement: NIHMS407328-supplement-7.pdf [file NIHMS407328-supplement-7.pdf]

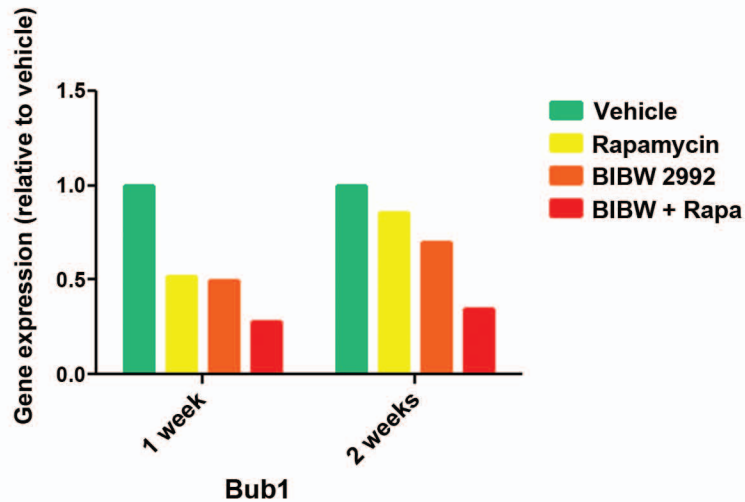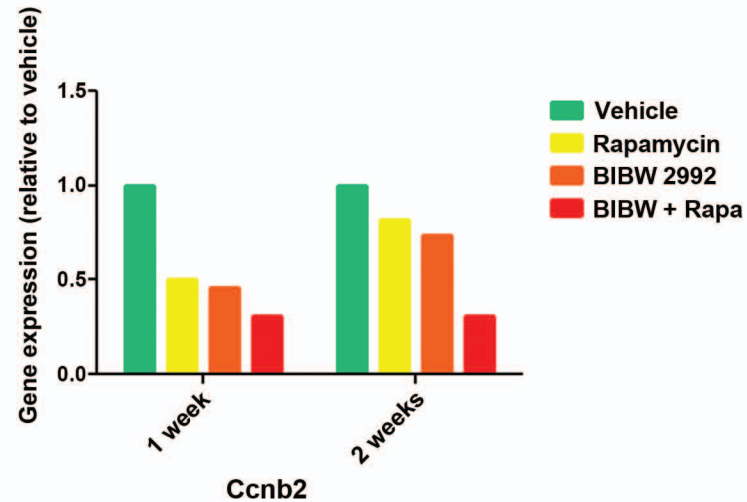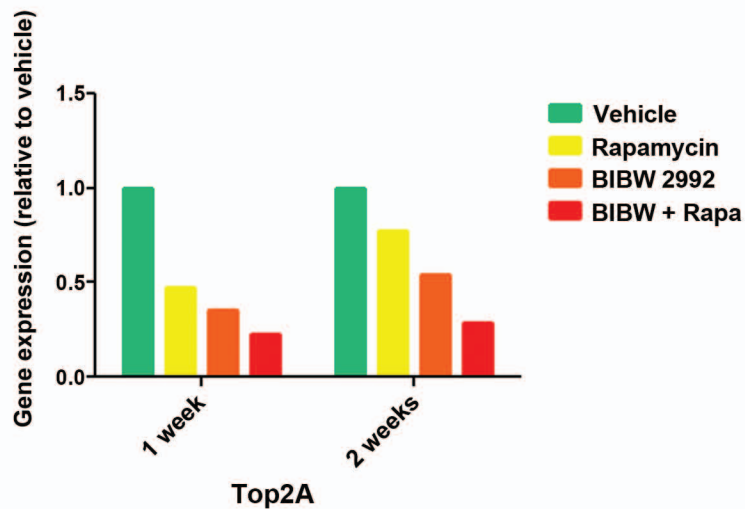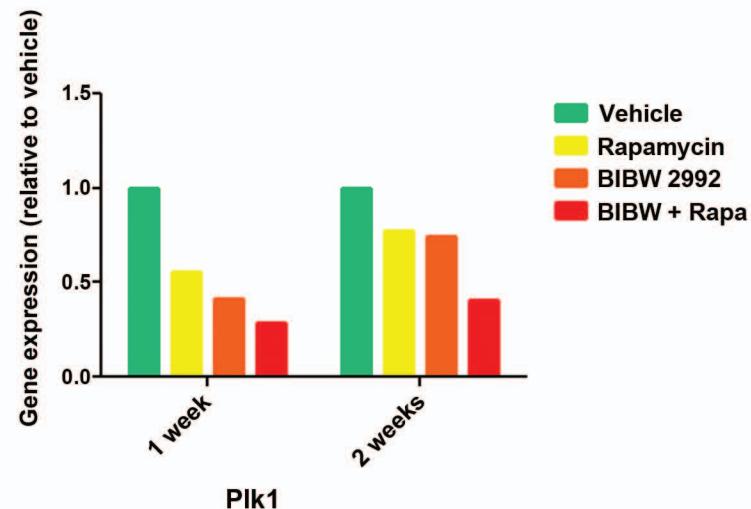

**Figure S4. Real-time quantitative PCR of differentially regulated genes in vehicle vs. drug-treated lungs.** Relative levels of each gene were determined by the  $\Delta\Delta C_t$  method using  $\beta$ -actin as a reference.
