# Supplementary material
Source: PubMed Central journal article supplement (PMC3500850)
Supplement: NIHMS407328-supplement-8.pdf [file NIHMS407328-supplement-8.pdf]

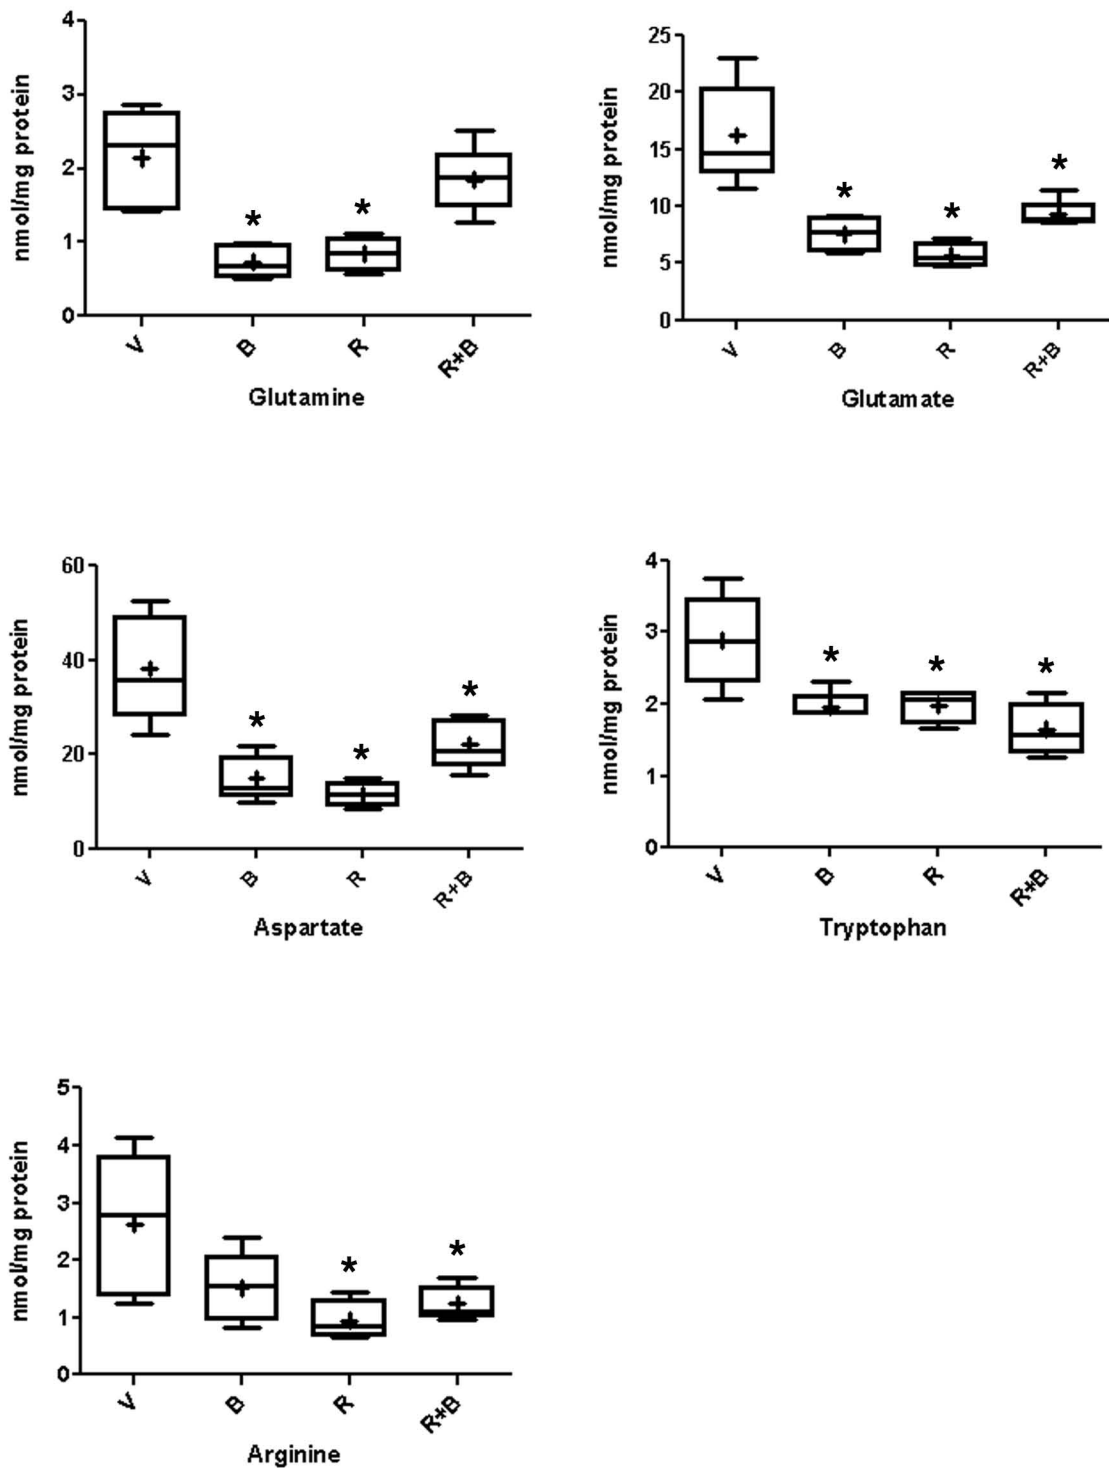

**Figure S5. LC-MS/MS validation for selected metabolites.** Whiskers represent minimum and maximum values. The bar represents the median value, and the plus sign the mean value for  $n = 4$  to  $5$  lung samples from individual mice after 2 weeks of drug treatment. The asterisk indicates  $p < 0.05$  for individual treatments compared to the average vehicle score.
